# Supplementary material
Source: publisher site journal article supplement (https://www.dovepress.com/get_supplementary_file.php?f=392262.docx)
Supplement: Supplementary file 1 [file get_supplementary_file.php]

**Durability of Antibody Response Against Hepatitis B Virus for a Decreased Crowd: A Retrospective Polycentric Cohort Study from a 10-Year Follow-up Clinical Study**

Pei He1,2, Jie Xia3, Peixin Zhang3, Wensu Yang1,2, Zhaoxin Xia1,2, Ping Liu4, Yi Zhu1,2, Yaping Fang5, Zhenhua Zhang3, Jilu Shen1,2

1 Department of Laboratory Medicine, The First Affiliated Hospital of Anhui Medical University, Hefei, China.

2 Department of Laboratory Medicine, Anhui Public Health Clinical Center, Hefei, China.

3 Department of Infectious Diseases, The Second Hospital of Anhui Medical University, Hefei, China.

4 Department of Infectious Diseases, Peopleʼs Hospital of Jieshou City, Fuyang, China.

5 Department of Clinical Laboratory, The Second Hospital of Anhui Medical University, Hefei, China.

Corresponding Author: Zhenhua Zhang, E-mail: zzh1974cn@163.com

Jilu Shen, Email: shenjilu@ahmu.edu.cn

**Figures & Table legends**

**Figure S1** Comparisons of the percentage of decline in HBsAb levels between groups. (a) Percentage of decline of HBsAb in the control and case groups. (b) Percentage of decline of HBsAb in each group. **Notes:** ****P* < 0.001, *****P* < 0.0001. (b) Three higher values were eliminated in Group 3.

**Figure S2.** The distribution of the HBeAb levels between groups. (a) The anti-HBe-first levels among the four groups. (b) The anti-HBe-Second levels among the four groups. **P* < 0.05, ***P* < 0.01, *****P* < 0.0001. Abbreviations: NS,nonsignificant.

**Figure S3.** Comparison of the persistence of HBsAb levels in each group. (a–d) The persistence of HBsAb levels between different groups. (e) The persistence of the HBsAb levels between the control and case groups.

**Table S1** Clinical performance of the biomarker in diagnosing a declining population


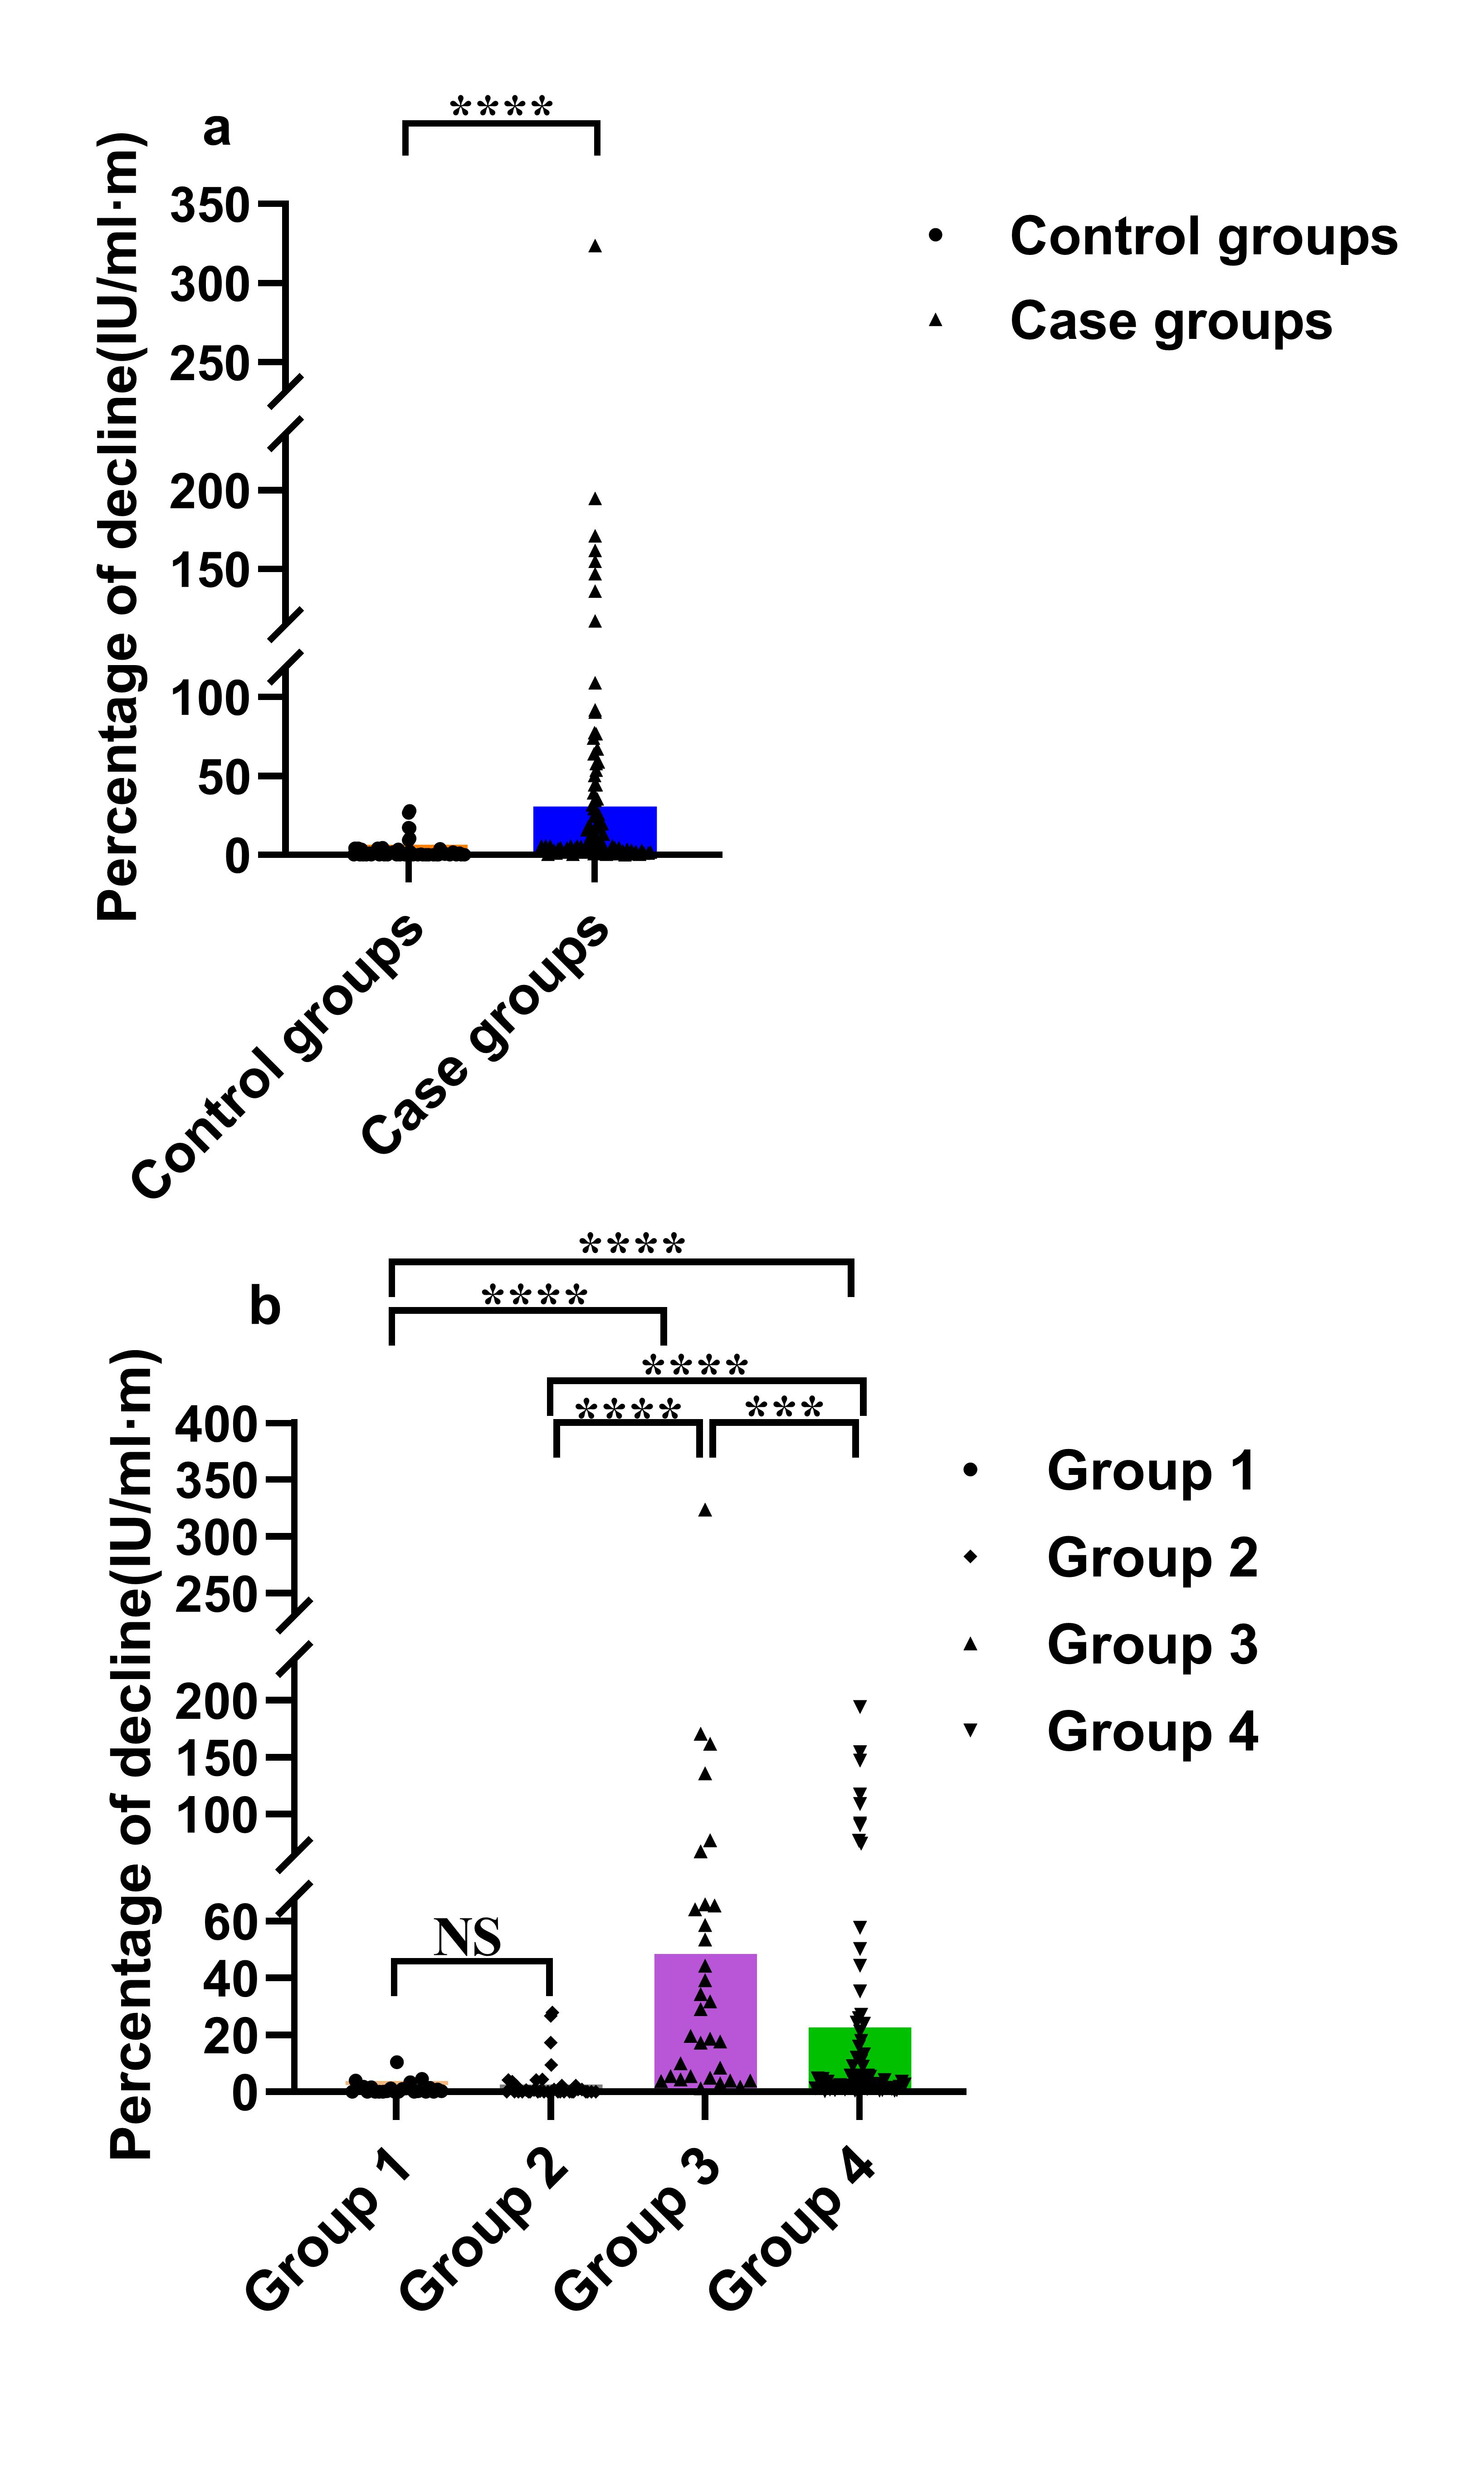


**Figure S1** Comparisons of the percentage of decline in HBsAb levels between groups.


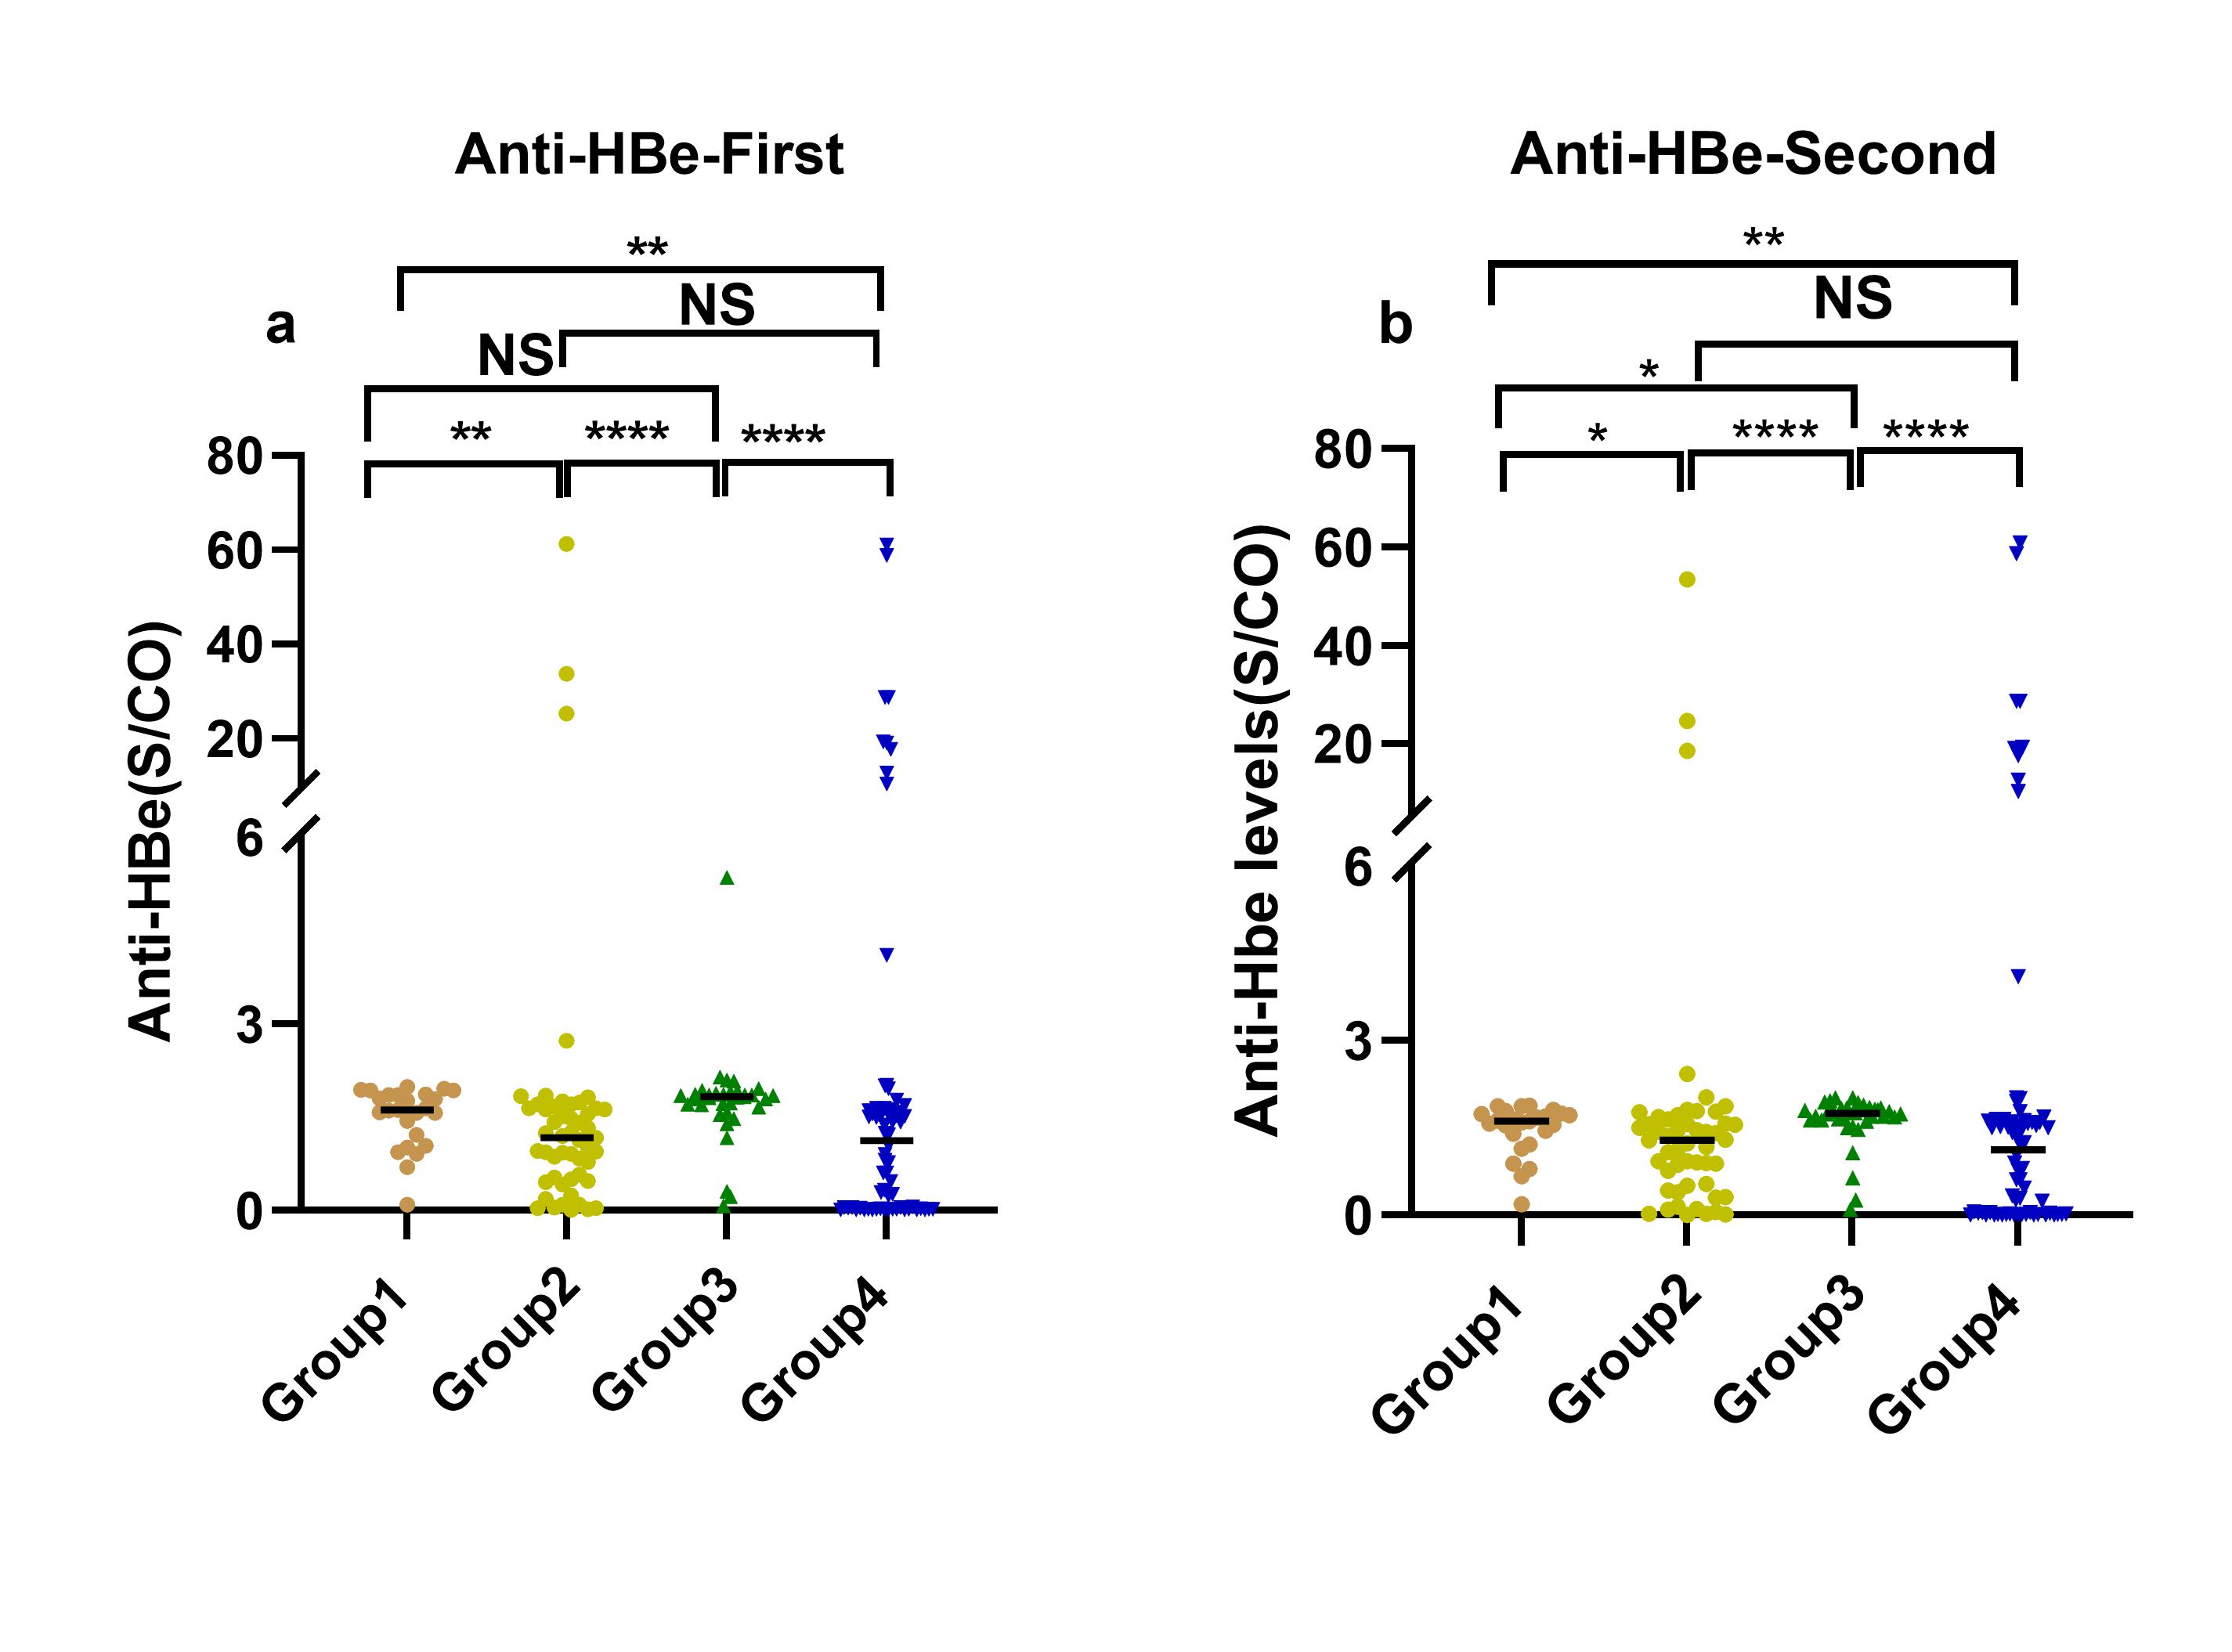


**Figure S2.** The distribution of the HBeAb levels between groups.

**Figure S3.** Comparison of the persistence of HBsAb levels in each group.


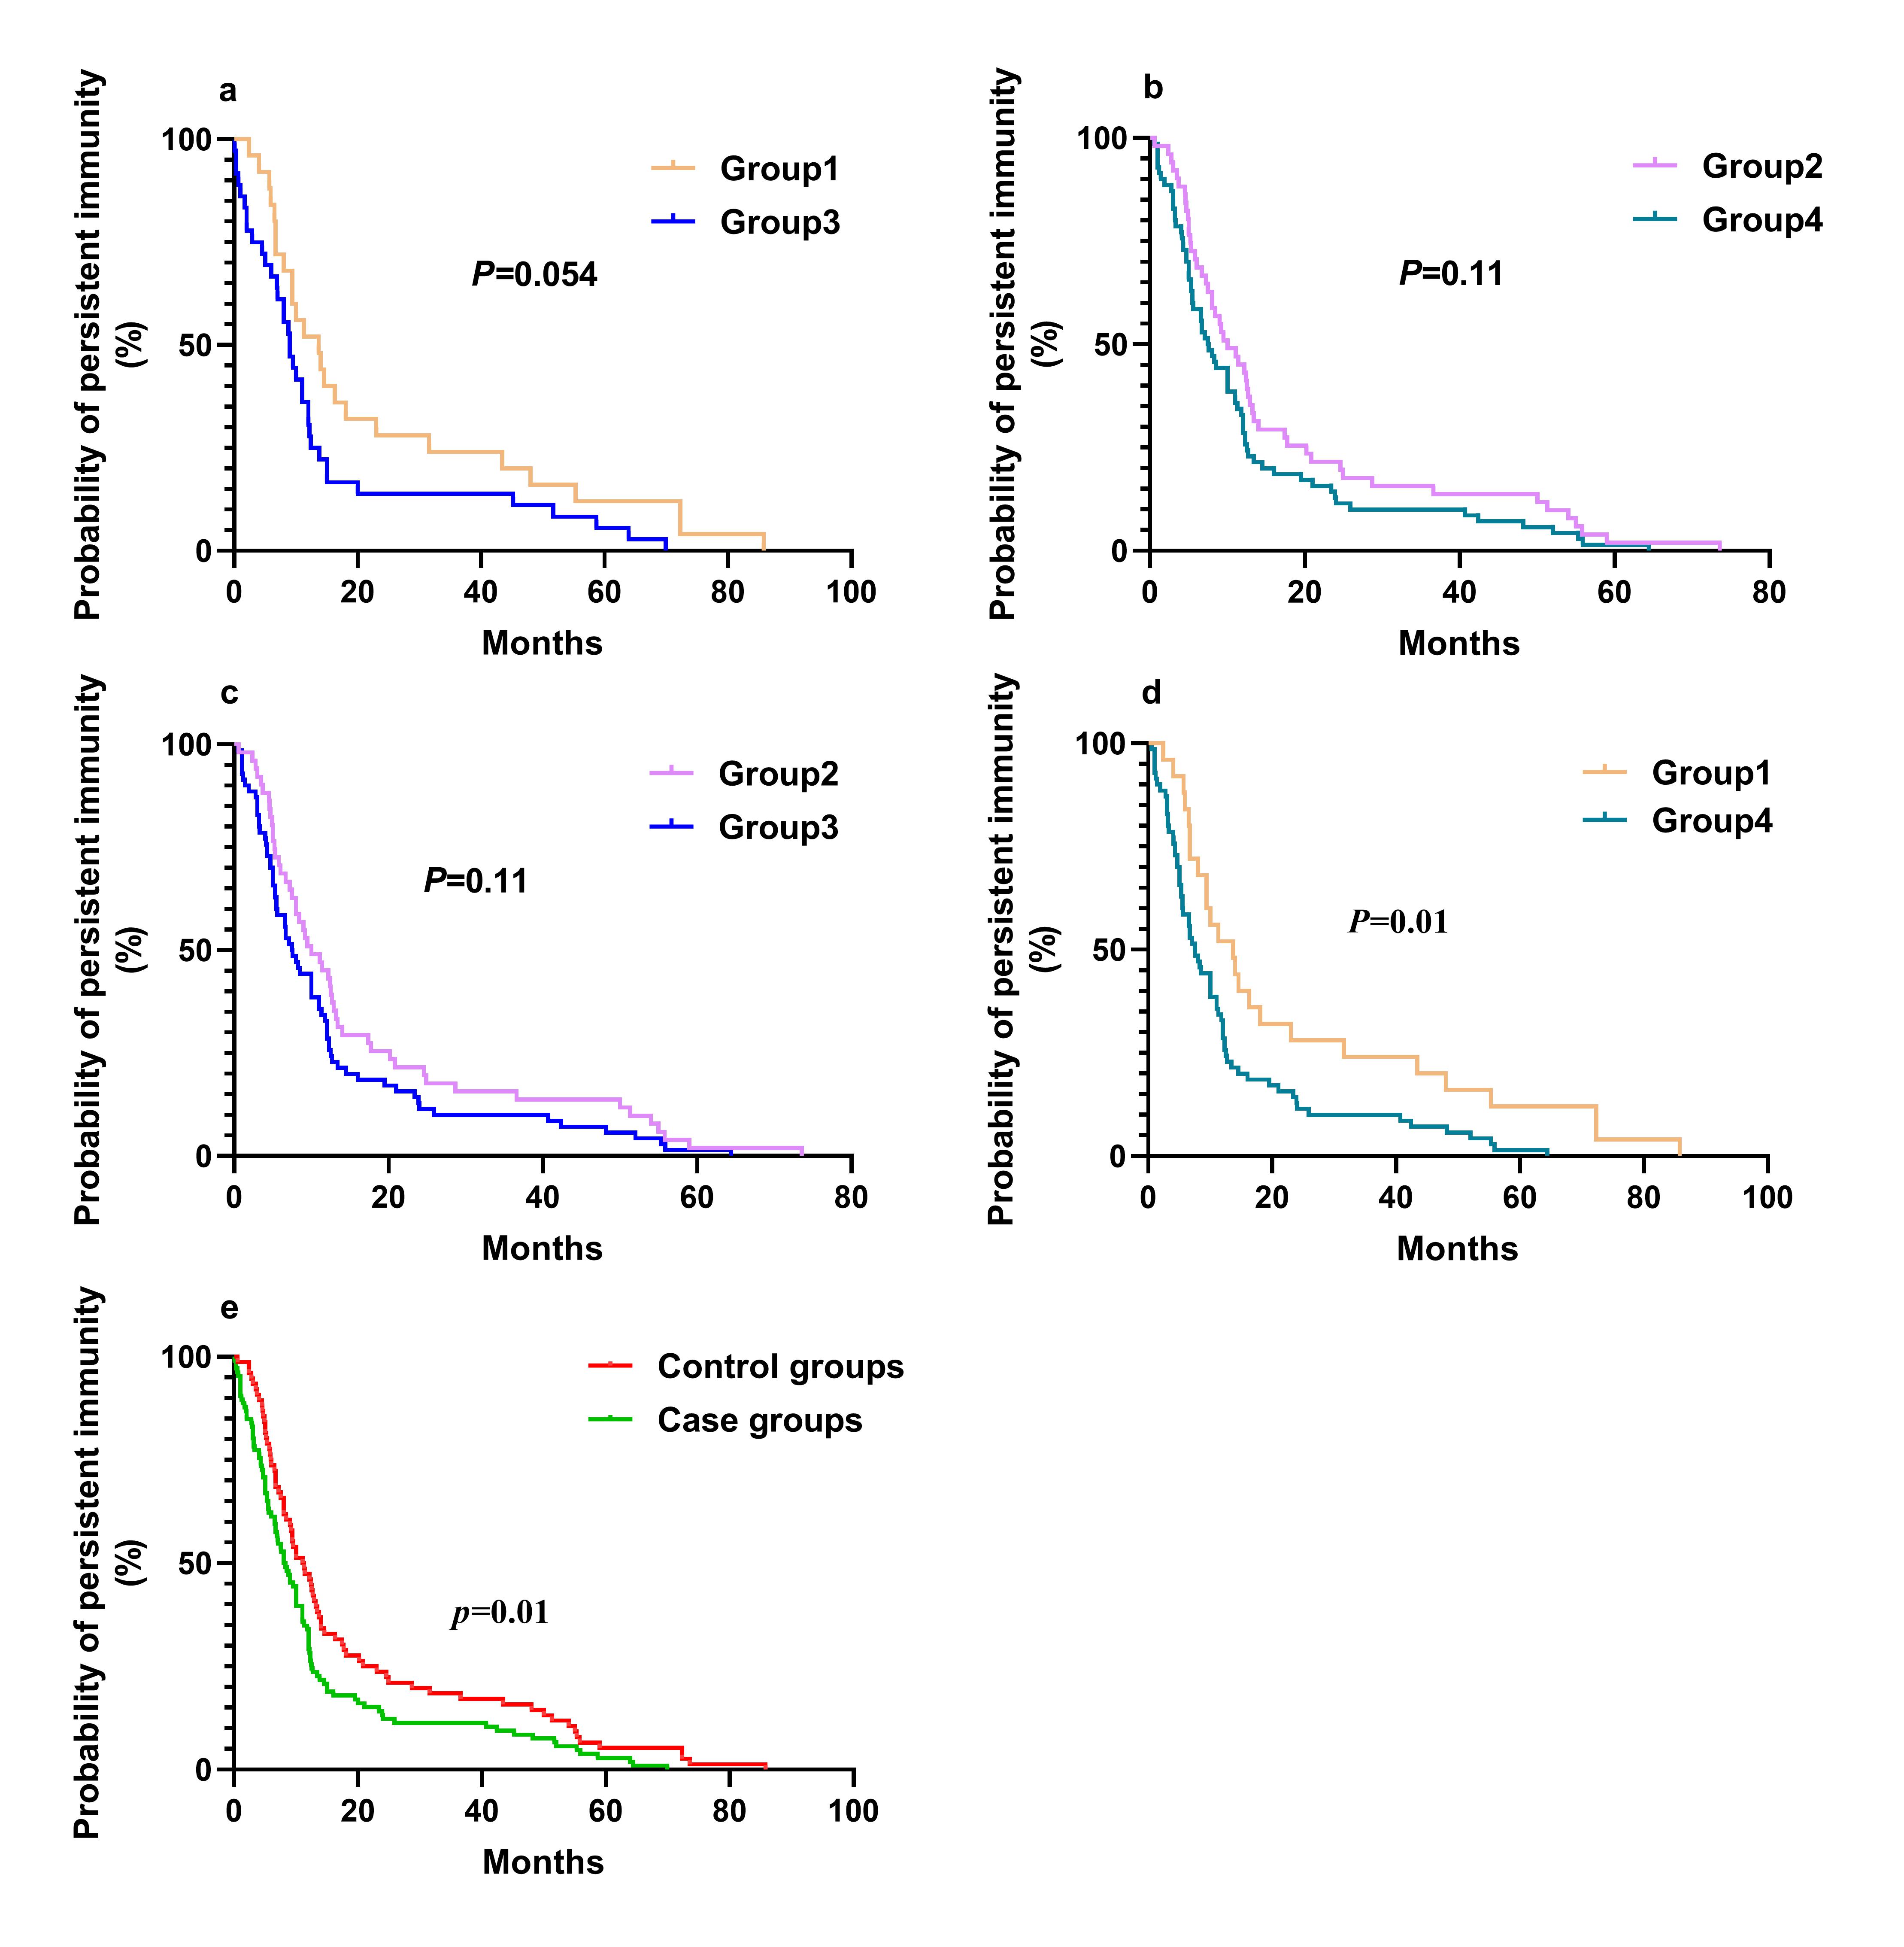


| **Table S1** Clinical performance of the biomarker in diagnosing a declining population | | | | | | | |
| --- | --- | --- | --- | --- | --- | --- | --- |
| **Biomarker** | **Cutoff** | **Sensitivity,%** | **Specificity,%** | **PLR** | **NLR** | **PPV,%** | **NPV,%** |
| **HBsAb difference value** | **8.53** | **94.3** | **69.7** | **3.12** | **0.08** | **0.81** | **0.9** |
